# Supplementary material for: Model constraints on the anthropogenic carbon budget of the Arctic Ocean
Source: Copernicus journal article supplement (doi:10.5194/bg-16-2343-2019), 2019-06-07
Supplement: Supplementary file 1 [file bg-16-2343-2019-supplement.zip]

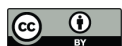

## *Supplement of*

# **Model constraints on the anthropogenic carbon budget of the Arctic Ocean**

**Jens Terhaar et al.**

*Correspondence to:* Jens Terhaar ([jens.terhaar@lsce.ipsl.fr](mailto:jens.terhaar@lsce.ipsl.fr))

- [bg-16-2343-2019-supplement-title-page.pdf](#)
- [pertco2\\_terhaar.html](#)
- [pertco2\\_terhaar.ipynb](#)

The copyright of individual parts of the supplement might differ from the CC BY 4.0 License.
